# Supplementary material for: Performance and cross-crop resistance of Cry1F-maize selected Spodoptera frugiperda on transgenic Bt cotton: implications for resistance management
Source: PubMed Central journal article supplement (PMC4908423; doi:10.1038/srep28059), 2016-06-15
Supplement: srep28059-s1.pdf [file srep28059-s1.pdf]

**Performance and cross-crop resistance of Cry1F-maize selected *Spodoptera frugiperda* on transgenic Bt cotton: implications for resistance management**

Fei Yang, David L. Kerns, Sebe Brown, Ryan Kurtz, Tim Dennehy, Bo Braxton, Graham Head, & Fangneng Huang

**Supplementary Information**

Table S1. Cotton varieties/lines evaluated in the study.

| <b>Supplier</b>  | <b>Designation</b> | <b>Variety</b>       | <b>Bt proteins</b>    |
|------------------|--------------------|----------------------|-----------------------|
| Bayer Cropsience | Non-Bt             | FM 966 LL            | None                  |
|                  | Cry1Ab             | T304-40              | Cry1Ab                |
|                  | Cry2Ae             | GHB119               | Cry2Ae                |
|                  | TwinLink           | FM 966 TwinLink      | Cry1Ab, Cry2Ae        |
|                  | TwinLink Plus      | FM 966 TwinLink Plus | Cry1Ab, Cry2Ae, Vip3A |
| Monsanto         | Bollgard I         | DPL 555 BR           | Cry1Ac                |
|                  | Bollgard II        | DP 0912 B2RF         | Cry1Ac, Cry2Ab        |
| Dow Agrosciences | WideStrike         | PHY 499 WRF          | Cry1Ac, Cry1F         |
|                  | WideStrike 3       | PHY 495 W3RF         | Cry1Ac, Cry1F, Vip3A  |

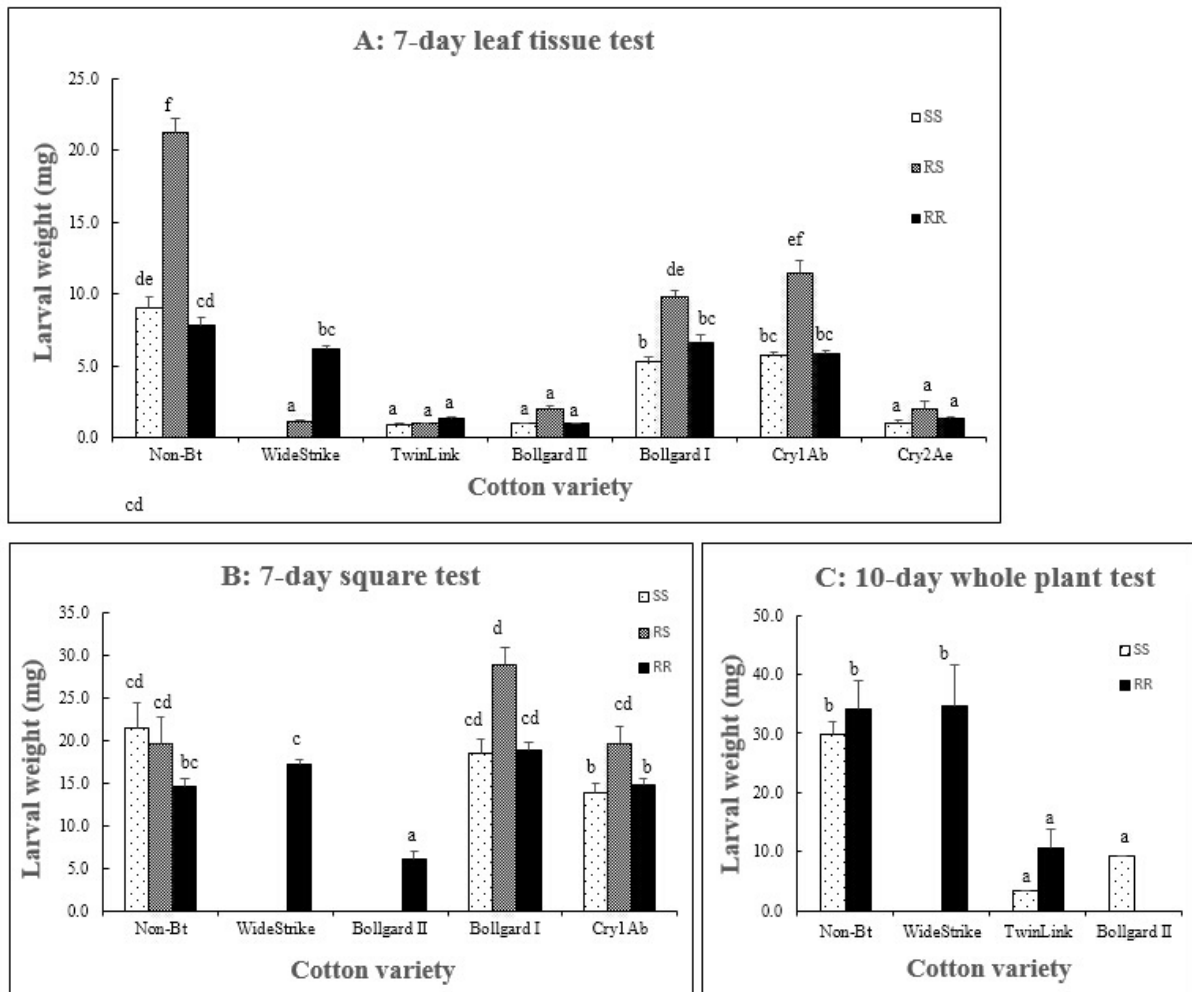

**Fig. S1.** Larval weight of Cry1F-susceptible (SS), -heterozygous (RS), and -resistant (RR) genotypes of *S. frugiperda* on leaf tissues (A), squares (B) and whole plants (C) of one non-Bt and eight Bt cotton varieties/lines: Bollgard I (Cry1Ac), Bollgard II (Cry1Ac/Cry2Ab), WideStrike (Cry1Ac/Cry1F), WideStrike 3 (Cry1Ac/Cry1F/Vip3A), TwinLink (Cry1Ab/Cry2Ae), TwinLink Plus (Cry1Ab/Cry2Ae/Vip3A), and two experimental lines expressing a single Bt gene of Cry1Ab and Cry2Ae, respectively. Mean values in a figure followed by a same letter are not significantly different (Tukey's HSD test,  $\alpha = 0.05$ ).
